# Supplementary material for: Insecticide-Treated Nets and Protection against Insecticide-Resistant Malaria Vectors in Western Kenya
Source: PubMed Central journal article supplement (PMC5403037; doi:10.3201/eid2305.161315), 2017-05
Supplement: 16-1315-Techapp-s1.pdf [file 16-1315-Techapp-s1.pdf]

# Insecticide-Treated Nets and Protection Against Insecticide-Resistant Malaria Vectors in Western Kenya

## Technical Appendix

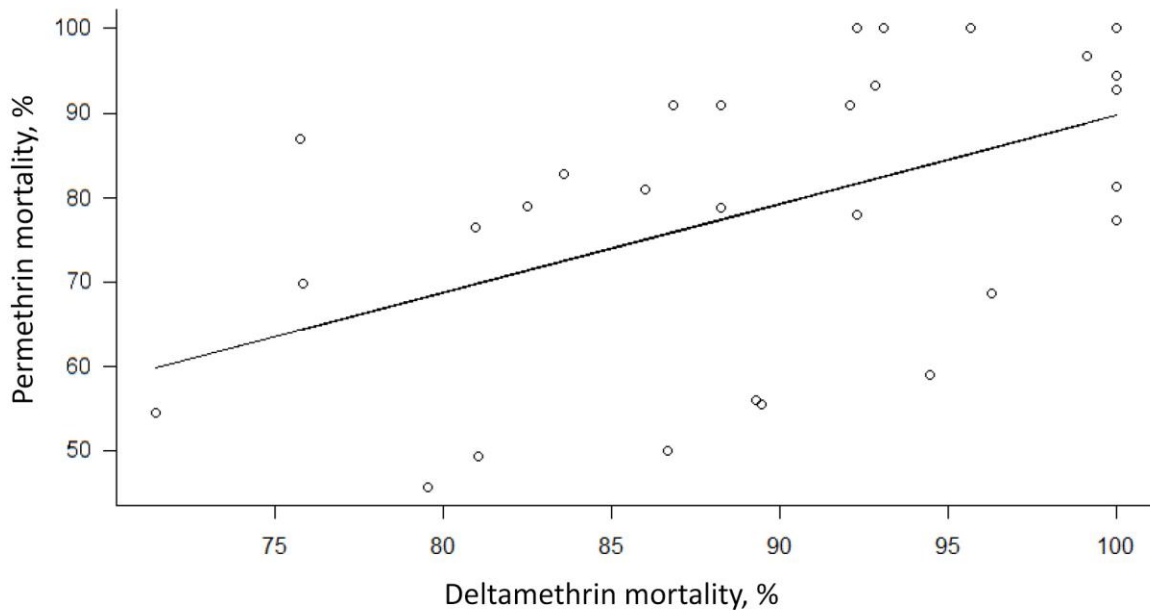

**Technical Appendix Figure 1.** Correlation between the percentages in permethrin and deltamethrin mortality as determined by the World Health Organization bioassay using *Anopheles arabiensis* collected in western Kenya, 2011. Kendall rank correlation tau = 0.376741; p value = 0.01.

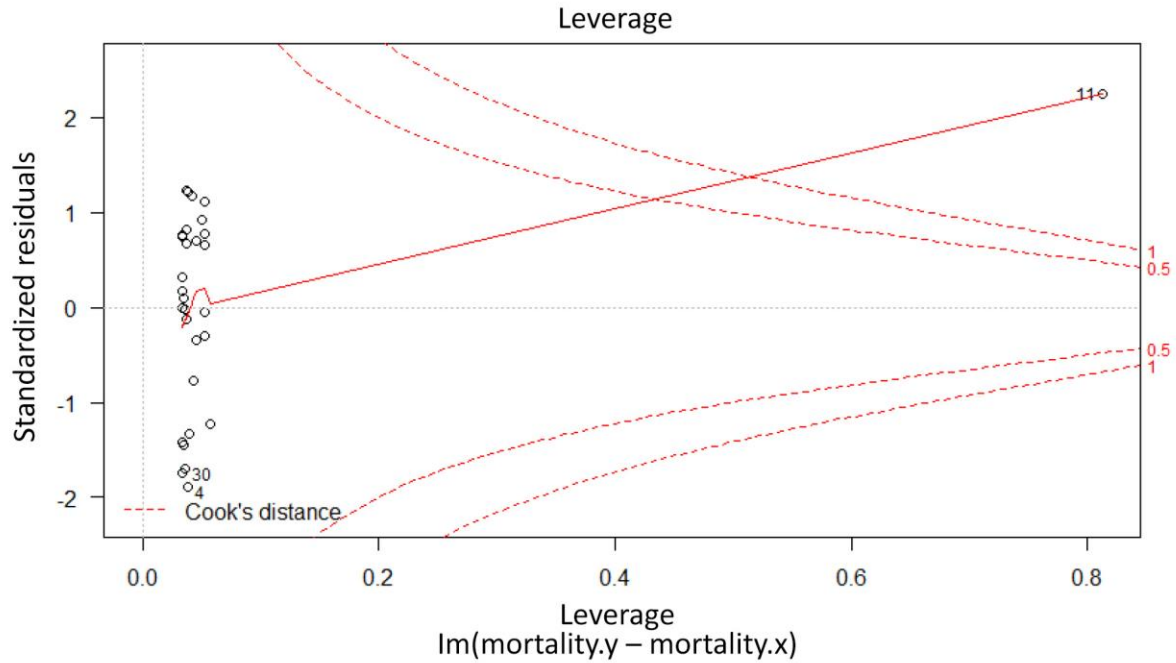

**Technical Appendix Figure 2.** Plot showing standardized residuals versus leverage. Graph was plotted following removal of an outlier with high leverage (labeled 11) identified by Cook's distance analysis. The Cook's distance for this cluster exceeded the conventional cutoff of  $4/n$ , in which  $n$  is the number of observations in the data set.
